# Supplementary material for: Symptom Burden of Atrial Fibrillation and Its Relation to Interventions and Outcome in Europe
Source: PubMed Central journal article supplement — J Am Heart Assoc. 2018 May 18;7(11):e007559. doi: 10.1161/JAHA.117.007559 (PMC6015366; doi:10.1161/jaha.117.007559), 2018-05-18
Supplement: JAH3-7-e007559-s001.pdf [file JAH3-7-e007559-s001.pdf]

# Supplementary Material

## Symptom Burden of Atrial Fibrillation and its Relation to Interventions and Outcome in Europe

Renate B. Schnabel <sup>a</sup>, MD, MSc, Ladislav Pecen <sup>b</sup>, Nargiz Rzayeva <sup>a</sup>, MSc, Markus Lucerna <sup>c</sup>,  
Yanish Purmah <sup>d</sup>, Francisco M. Ojeda <sup>a</sup>, PhD, Raffaele De Caterina <sup>e</sup>, Paulus Kirchhof <sup>d</sup>

<sup>a</sup> University Heart Center Hamburg Eppendorf, Hamburg, Germany, German Center for Cardiovascular Research (DZHK) partner site Hamburg/Kiel/Lübeck; <sup>b</sup> Medical faculty Pilsen of Charles University, Czech Republic; <sup>c</sup> Daiichi Sankyo Europe, Munich, Germany; <sup>d</sup> Institute of Cardiovascular Sciences, University of Birmingham and SWBH and UHB NHS Trust, Birmingham, UK; <sup>e</sup> G. d'Annunzio University, Chieti, Italy, and Fondazione G. Monasterio, Pisa, Italy

**Supplementary Methods** Literature evidence for the selection of predictor variables and potential confounders

| <b>Variables</b>                         | <b>Reference</b> |
|------------------------------------------|------------------|
| Age                                      | 1-4              |
| Gender                                   | 1-4              |
| Body mass index                          | 5-7              |
| Systolic blood pressure                  | 5,6              |
| Hypertension                             | 1,4              |
| Smoking                                  | 8,9              |
| Alcohol intake                           | 9-11             |
| Diabetes mellitus                        | 1,4              |
| Dyslipidaemia                            | 8,9              |
| History of myocardial infarction         | 3,5              |
| Heart failure                            | 1,12             |
| History of ischemic stroke/TIA           | 1,4,13           |
| History of cardioversion and/or ablation | 1                |

**Supplementary Table 1.** Selected items from the EQ-5D-5L Questionnaire

---

USUAL ACTIVITIES (e.g. work, study, housework, family or leisure activities)

I have no problems doing my usual activities

I have slight problems doing my usual activities

I have moderate problems doing my usual activities

I have severe problems doing my usual activities

I am unable to do my usual activities

We would like to know how good or bad your health is TODAY.

This scale is numbered from 0 to 100. 100 means the best health you can imagine.

0 means the worst health you can imagine.

- Mark an X on the scale to indicate how your health is TODAY.
- Now, please write the number you marked on the scale in the box below.

YOUR HEALTH TODAY =

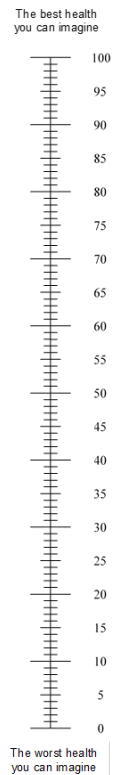

---

EQ-5D™ is a trade mark of the EuroQol Group.

**Supplementary Table 2.** Selected items from the Perception of Anticoagulant Treatment Questionnaire (PACT-Q)<sup>14</sup>

B1 - How difficult is it to take your anticoagulant treatment (e.g., pills or injections, number of pills or injections, frequency of intake ...)?

| 1          | 2        | 3          | 4    | 5         |
|------------|----------|------------|------|-----------|
| Not at all | A little | Moderately | Very | Extremely |

C1 - Because of potential side effects (e.g., minor bruises, bleeding...), do you limit your usual activities (i.e., work, leisure, social, or physical activities...)?

| 1          | 2        | 3          | 4     | 5          |
|------------|----------|------------|-------|------------|
| Not at all | A little | Moderately | A lot | Completely |

D1 - How reassured do you feel by your anticoagulant treatment?

| 1          | 2        | 3        | 4    | 5          |
|------------|----------|----------|------|------------|
| Not at all | A little | Somewhat | Very | Completely |

D3 - How did your experience with side effects such as minor bruises or bleeding (e.g., while shaving, cooking, after small cuts...) compare to what you expected?

| 1                                     | 2                                | 3                             | 4                                 | 5                                      |
|---------------------------------------|----------------------------------|-------------------------------|-----------------------------------|----------------------------------------|
| It is much worse than what I expected | It is worse than what I expected | It is exactly what I expected | It is better than what I expected | It is much better than what I expected |

D7 - Overall, how satisfied are you with your anticoagulant treatment?

| 1                      | 2            | 3                                  | 4         | 5                   |
|------------------------|--------------|------------------------------------|-----------|---------------------|
| Extremely dissatisfied | Dissatisfied | Neither satisfied nor dissatisfied | Satisfied | Extremely satisfied |

**Supplementary Table 3** Baseline characteristics of the patients entering the analyses compared to patients excluded from the analyses due to missing follow-up information or missing EHRA data at baseline

| Variables                                                                    | Study sample | Excluded due to    | P Value |
|------------------------------------------------------------------------------|--------------|--------------------|---------|
|                                                                              | N= 6196      | missing<br>N=1047* |         |
| Age, years (SD)                                                              | 71.8±10.4    | 70.7±12.1          | 0.13    |
| Female gender, N (%)                                                         | 2460 (39.7)  | 426 (41.4)         | 0.32    |
| Body mass index, kg/m <sup>2</sup> (SD)                                      | 27.9±5.0     | 28.0±5.0           | 0.68    |
| Systolic blood pressure, mm Hg (SD)                                          | 131.5±16.5   | 132.1±17.6         | 0.11    |
| Hypertension, N (%)                                                          | 4514 (73.3)  | 727 (71.2)         | 0.16    |
| Ever smoking, N (%)                                                          | 2331 (39.7)  | 382 (39.2)         | 0.61    |
| Alcohol abuse, N (%)                                                         | 157 (2.6)    | 25 (2.6)           | 0.99    |
| Diabetes mellitus, N (%)                                                     | 1368 (22.3)  | 249 (24.4)         | 0.14    |
| Dyslipidaemia, N (%)                                                         | 2697 (44.5)  | 436 (43.6)         | 0.61    |
| History of myocardial infarction, N (%)                                      | 663 (10.7)   | 110 (10.7)         | 0.97    |
| Heart failure, N (%)                                                         | 1723 (28.6)  | 263 (26.4)         | 0.17    |
| History of ischemic stroke/TIA/other<br>ischemic-thromboembolic event, N (%) | 924 (15.1)   | 149 (14.9)         | 0.91    |
| EHRA score ≥2, N (%)                                                         | 5695 (91.9)  | 889 (92.9)         | 0.30    |
| History of cardioversion and/or ablation,<br>N (%)                           | 2147 (34.7)  | 381 (37.6)         | 0.07    |

Data are presented as mean and standard deviation for continuous and percentages for discrete variables.

**Supplementary Table 4** Multivariable stepwise selection model for variables correlates of EHRA score at baseline

| <b>Variables</b>                                | <b>Partial R<sup>2</sup></b> | <b>Model R<sup>2</sup></b> | <b>β</b>         | <b>F Value</b> | <b>P Value</b> | <b>P Value*</b> |
|-------------------------------------------------|------------------------------|----------------------------|------------------|----------------|----------------|-----------------|
| <b>Female gender</b>                            | 0.0230                       | 0.0590                     | 0.361±0.025      | 139.47         | <0.0001        | <0.0001         |
| <b>Ever smoking</b>                             | 0.0104                       | 0.0694                     | 0.190±0.026      | 62.68          | <0.0001        | <0.0001         |
| <b>History of cardioversion and/or ablation</b> | 0.0043                       | 0.0737                     | 0.124±0.024      | 26.21          | <0.0001        | 0.001           |
| <b>Body mass index, kg/m<sup>2</sup></b>        | 0.0031                       | 0.0769                     | 0.011±0.002      | 18.87          | <0.0001        | 0.005           |
| <b>Diabetes mellitus</b>                        | 0.0008                       | 0.0776                     | -<br>0.065±0.029 | 4.73           | 0.03           | 0.06            |
| <b>History of myocardial infarction</b>         | 0.0008                       | 0.0785                     | 0.086±0.038      | 5.03           | 0.03           | 0.04            |
| <b>Heart failure</b>                            | 0.0360                       | 0.0360                     | 0.387±0.026      | 208.49         | <0.0001        | <0.0001         |

All variables from Table 1 were permitted to enter the analysis. Partial R<sup>2</sup> is provided for the variation in EHRA score explained by the clinical variable. β, the regression coefficient, shows estimated change in EHRA score for one unit increment in body mass index or the condition present for categorical variables. \*P Value derived by bootstrapping. At 91% of stepwise selection models from 1000 runs of bootstrapping a subset of presented variables was selected.

**Supplementary Table 5** Multivariable-adjusted logistic regression analyses for EHRA score and EHRA symptom dimensions separately in relation to interventions to restore sinus rhythm at one year

| <b>Variable</b>                                           | <b>Odds ratio<br/>EHRA 3/4<br/>versus<br/>1/2</b> | <b>95%<br/>Confidence interval</b> |      | <b>P Value</b> | <b>P Value<br/>adjusted<br/>logistic<br/>regression.<br/>across all 4<br/>categories</b> | <b>AUC –<br/>resubstitution</b> | <b>AUC – 10-fold<br/>cross validation</b> | <b>P- Value<br/>10-fold<br/>cross<br/>validation</b> |
|-----------------------------------------------------------|---------------------------------------------------|------------------------------------|------|----------------|------------------------------------------------------------------------------------------|---------------------------------|-------------------------------------------|------------------------------------------------------|
| <b><i>Cardioversio, N=701 (11.3%)</i></b>                 |                                                   |                                    |      |                |                                                                                          |                                 |                                           |                                                      |
| Palpitations                                              | 1.32                                              | 1.08                               | 1.61 | 0.007          | <0.0001                                                                                  | 0.682/0.548                     | 0.621/0.539                               | 0.009                                                |
| Fatigue                                                   | 1.16                                              | 0.97                               | 1.39 | 0.11           | 0.18                                                                                     | 0.678/0.520                     | 0.601/0.513                               | 0.19                                                 |
| Dizziness                                                 | 1.27                                              | 0.98                               | 1.64 | 0.07           | 0.32                                                                                     | 0.678/0.508                     | 0.560/0.506                               | 0.39                                                 |
| Dyspnea                                                   | 1.05                                              | 0.86                               | 1.27 | 0.65           | 0.79                                                                                     | 0.676/0.507                     | 0.592/0.506                               | 0.76                                                 |
| Chest pain                                                | 1.37                                              | 0.97                               | 1.93 | 0.08           | 0.20                                                                                     | 0.679/0.510                     | 0.604/0.509                               | 0.23                                                 |
| Anxiety                                                   | 0.79                                              | 0.63                               | 0.99 | 0.04           | 0.08                                                                                     | 0.677/0.507                     | 0.603/0.506                               | 0.35                                                 |
| EHRA score                                                | 1.21                                              | 1.01                               | 1.45 | 0.040          | 0.07                                                                                     | 0.679/0.534                     | 0.616/0.533                               | 0.04                                                 |
| <b><i>Catheter-based ablation, N=226 (3.4%)</i></b>       |                                                   |                                    |      |                |                                                                                          |                                 |                                           |                                                      |
| Palpitations                                              | 2.02                                              | 1.48                               | 2.76 | <0.0001        | <0.0001                                                                                  | 0.808/0.599                     | 0.715/0.574                               | <0.0001                                              |
| Fatigue                                                   | 1.67                                              | 1.23                               | 2.26 | 0.0009         | 0.002                                                                                    | 0.800/0.545                     | 0.691/0.535                               | 0.007                                                |
| Dizziness                                                 | 1.11                                              | 0.70                               | 1.75 | 0.65           | 0.90                                                                                     | 0.796/0.504                     | 0.688/0.503                               | 0.91                                                 |
| Dyspnea                                                   | 1.19                                              | 0.84                               | 1.68 | 0.26           | 0.008                                                                                    | 0.796/0.511                     | 0.690/0.509                               | 0.27                                                 |
| Chest pain                                                | 1.41                                              | 0.79                               | 2.52 | 0.24           | 0.25                                                                                     | 0.797/0.510                     | 0.689/0.507                               | 0.34                                                 |
| Anxiety                                                   | 1.26                                              | 0.88                               | 1.80 | 0.21           | 0.20                                                                                     | 0.797/0.521                     | 0.692/0.518                               | 0.23                                                 |
| EHRA score                                                | 1.97                                              | 1.44                               | 2.69 | <0.0001        | <0.0001                                                                                  | 0.804/0.568                     | 0.708/0.550                               | 0.0003                                               |
| <b><i>Sinus rhythm at one year, N=2022 (32.6%)</i></b>    |                                                   |                                    |      |                |                                                                                          |                                 |                                           |                                                      |
| Palpitations                                              | 1.51                                              | 1.30                               | 1.76 | <0.0001        | <0.0001                                                                                  | 0.706/0.551                     | 0.651/0.550                               | 0.0004                                               |
| Fatigue                                                   | 0.98                                              | 0.86                               | 1.12 | 0.76           | 0.93                                                                                     | 0.702/0.520                     | 0.640/0.514                               | 0.83                                                 |
| Dizziness                                                 | 0.90                                              | 0.74                               | 1.10 | 0.31           | 0.75                                                                                     | 0.702/0.514                     | 0.638/0.510                               | 0.84                                                 |
| Dyspnea                                                   | 0.86                                              | 0.74                               | 0.99 | 0.033          | 0.003                                                                                    | 0.703/0.538                     | 0.644/0.530                               | 0.04                                                 |
| Chest pain                                                | 1.44                                              | 1.90                               | 1.10 | 0.009          | 0.01                                                                                     | 0.703/0.505                     | 0.641/0.504                               | 0.54                                                 |
| Anxiety                                                   | 1.04                                              | 0.89                               | 1.22 | 0.60           | 0.007                                                                                    | 0.702/0.512                     | 0.641/0.510                               | 0.61                                                 |
| EHRA score                                                | 1.06                                              | 0.93                               | 1.20 | 0.40           | 0.048                                                                                    | 0.702/0.501                     | 0.628/0.501                               | 0.97                                                 |
| <b><i>Adequate heart rate control, N=2734 (44.1%)</i></b> |                                                   |                                    |      |                |                                                                                          |                                 |                                           |                                                      |
| Palpitations                                              | 0.81                                              | 0.68                               | 0.95 | 0.012          | 0.03                                                                                     | 0.565/0.516                     | 0.550/0.515                               | 0.05                                                 |
| Fatigue                                                   | 0.86                                              | 0.74                               | 0.99 | 0.04           | 0.03                                                                                     | 0.560/0.511                     | 0.544/0.510                               | 0.18                                                 |
| Dizziness                                                 | 1.00                                              | 0.82                               | 1.23 | 0.97           | 0.23                                                                                     | 0.558/0.501                     | 0.537/0.501                               | 0.99                                                 |

| <b>Variable</b> | <b>Odds ratio<br/>EHRA 3/4<br/>versus<br/>1/2</b> | <b>95%<br/>Confidence interval</b> |      | <b>P Value</b> | <b>P Value<br/>adjusted<br/>logistic<br/>regression.<br/>across all 4<br/>categories</b> | <b>AUC –<br/>resubstitution</b> | <b>AUC – 10-fold<br/>cross validation</b> | <b>P- Value<br/>10-fold<br/>cross<br/>validation</b> |
|-----------------|---------------------------------------------------|------------------------------------|------|----------------|------------------------------------------------------------------------------------------|---------------------------------|-------------------------------------------|------------------------------------------------------|
| Dyspnea         | 0.88                                              | 0.76                               | 1.02 | 0.10           | 0.16                                                                                     | 0.559/0.508                     | 0.541/0.506                               | 0.44                                                 |
| Chest pain      | 0.84                                              | 0.62                               | 1.14 | 0.27           | 0.51                                                                                     | 0.559/0.505                     | 0.540/0.504                               | 0.61                                                 |
| Anxiety         | 0.91                                              | 0.76                               | 1.07 | 0.25           | 0.51                                                                                     | 0.560/0.502                     | 0.538/0.502                               | 0.82                                                 |
| EHRA score      | 0.80                                              | 0.70                               | 0.92 | 0.001          | 0.005                                                                                    | 0.565/0.521                     | 0.551/0.519                               | 0.04                                                 |

Odds ratios are provided for EHRA score category 3/4 versus 1/2. P-values across all 4 categories are from logistic regression analyses as implemented in SAS proc logistic. All models are adjusted for age, sex, country, body mass index, systolic blood pressure, hypertension, diabetes mellitus, smoking, heart failure, history of myocardial infarction. AUCs (area under the curve) are for the whole model/ partial EHRA component.



**Supplementary Table 6** Multivariable-adjusted logistic regression- and area under the curve analysis for EHRA score and EHRA symptom dimensions separately in relation to cardiovascular outcomes at one year

| <b>Variable</b>                                                           | <b>Odds ratio<br/>EHRA 3/4<br/>versus<br/>1/2</b> | <b>95%<br/>Confidence interval</b> |      | <b>P Value</b> | <b>P Value<br/>adjusted<br/>logistic<br/>regression<br/>across all 4<br/>categories</b> | <b>AUC –<br/>resubstitution</b> | <b>AUC – 10-fold<br/>cross validation</b> | <b>P-value<br/>10-fold<br/>cross<br/>validation</b> |
|---------------------------------------------------------------------------|---------------------------------------------------|------------------------------------|------|----------------|-----------------------------------------------------------------------------------------|---------------------------------|-------------------------------------------|-----------------------------------------------------|
| <b><u>Stroke/TIA/arterial thromboembolic events,<br/>N=136 (2.2%)</u></b> |                                                   |                                    |      |                |                                                                                         |                                 |                                           |                                                     |
| Palpitations                                                              | 0.92                                              | 0.58                               | 1.46 | 0.72           | 0.29                                                                                    | 0.707/0.502                     | 0.641/0.502                               | 0.86                                                |
| Fatigue                                                                   | 1.04                                              | 0.72                               | 1.51 | 0.82           | 0.92                                                                                    | 0.706/0.535                     | 0.639/0.517                               | 0.88                                                |
| Dizziness                                                                 | 1.32                                              | 0.82                               | 2.13 | 0.26           | 0.002                                                                                   | 0.706/0.526                     | 0.642/0.521                               | 0.36                                                |
| Dyspnea                                                                   | 1.04                                              | 0.71                               | 1.53 | 0.84           | 0.59                                                                                    | 0.706/0.547                     | 0.643/0.527                               | 0.55                                                |
| Chest pain                                                                | 1.69                                              | 0.92                               | 3.10 | 0.09           | 0.002                                                                                   | 0.704/0.526                     | 0.645/0.522                               | 0.14                                                |
| Anxiety                                                                   | 0.55                                              | 0.32                               | 0.93 | 0.03           | 0.08                                                                                    | 0.711/0.521                     | 0.653/0.520                               | 0.06                                                |
| EHRA score                                                                | 1.02                                              | 0.70                               | 1.49 | 0.92           | 0.05                                                                                    | 0.706/0.540                     | 0.646/0.519                               | 0.88                                                |
| <b><u>Coronary events,<br/>N=140 (2.3%)</u></b>                           |                                                   |                                    |      |                |                                                                                         |                                 |                                           |                                                     |
| Palpitations                                                              | 0.98                                              | 0.60                               | 1.60 | 0.95           | 0.21                                                                                    | 0.725/0.515                     | 0.645/0.512                               | 0.97                                                |
| Fatigue                                                                   | 1.09                                              | 0.75                               | 1.58 | 0.64           | 0.73                                                                                    | 0.724/0.533                     | 0.649/0.520                               | 0.65                                                |
| Dizziness                                                                 | 1.16                                              | 0.70                               | 1.91 | 0.57           | 0.72                                                                                    | 0.725/0.512                     | 0.647/0.510                               | 0.59                                                |
| Dyspnea                                                                   | 1.32                                              | 0.90                               | 1.93 | 0.16           | 0.024                                                                                   | 0.726/0.559                     | 0.654/0.532                               | 0.18                                                |
| Chest pain                                                                | 2.45                                              | 1.42                               | 4.22 | 0.001          | <0.0001                                                                                 | 0.734/0.546                     | 0.657/0.543                               | 0.02                                                |
| Anxiety                                                                   | 1.41                                              | 0.91                               | 2.18 | 0.13           | 0.33                                                                                    | 0.727/0.513                     | 0.652/0.511                               | 0.40                                                |
| EHRA score                                                                | 1.45                                              | 0.99                               | 2.13 | 0.06           | 0.12                                                                                    | 0.727/0.560                     | 0.654/0.542                               | 0.07                                                |
| <b><u>Heart failure,<br/>N=155 (2.5%)</u></b>                             |                                                   |                                    |      |                |                                                                                         |                                 |                                           |                                                     |
| Palpitations                                                              | 1.14                                              | 0.74                               | 1.76 | 0.56           | 0.42                                                                                    | 0.639/0.508                     | 0.568/0.506                               | 0.71                                                |
| Fatigue                                                                   | 1.84                                              | 1.30                               | 2.60 | 0.0006         | 0.0006                                                                                  | 0.656/0.576                     | 0.609/0.557                               | 0.005                                               |
| Dizziness                                                                 | 1.50                                              | 0.93                               | 2.41 | 0.10           | 0.19                                                                                    | 0.644/0.523                     | 0.588/0.518                               | 0.21                                                |
| Dyspnea                                                                   | 2.33                                              | 1.63                               | 3.33 | <0.0001        | <0.0001                                                                                 | 0.669/0.598                     | 0.615/0.580                               | <0.0001                                             |
| Chest pain                                                                | 1.25                                              | 0.57                               | 2.75 | 0.58           | 0.42                                                                                    | 0.637/0.502                     | 0.570/0.502                               | 0.94                                                |
| Anxiety                                                                   | 1.72                                              | 1.16                               | 2.55 | 0.007          | 0.032                                                                                   | 0.648/0.545                     | 0.590/0.543                               | 0.04                                                |
| EHRA score                                                                | 1.65                                              | 1.16                               | 2.34 | 0.005          | 0.005                                                                                   | 0.653/0.567                     | 0.592/0.555                               | 0.02                                                |

| Variable                      | Odds ratio<br>EHRA 3/4<br>versus<br>1/2 | 95%<br>Confidence interval |      | P Value | P Value<br>adjusted<br>logistic<br>regression<br>across all 4<br>categories | AUC –<br>resubstitution | AUC – 10-fold<br>cross validation | P-value<br>10-fold<br>cross<br>validation |
|-------------------------------|-----------------------------------------|----------------------------|------|---------|-----------------------------------------------------------------------------|-------------------------|-----------------------------------|-------------------------------------------|
| <b><u>Major bleeding,</u></b> |                                         |                            |      |         |                                                                             |                         |                                   |                                           |
| <b><u>N=168 (2.7%)</u></b>    |                                         |                            |      |         |                                                                             |                         |                                   |                                           |
| Palpitations                  | 0.88                                    | 0.55                       | 1.41 | 0.59    | 0.78                                                                        | 0.651/0.516             | 0.581/0.513                       | 0.67                                      |
| Fatigue                       | 1.27                                    | 0.90                       | 1.79 | 0.17    | 0.28                                                                        | 0.656/0.541             | 0.592/0.531                       | 0.20                                      |
| Dizziness                     | 1.08                                    | 0.67                       | 1.74 | 0.74    | 0.90                                                                        | 0.650/0.509             | 0.582/0.507                       | 0.78                                      |
| Dyspnea                       | 0.92                                    | 0.64                       | 1.34 | 0.67    | 0.61                                                                        | 0.651/0.520             | 0.583/0.512                       | 0.73                                      |
| Chest pain                    | 0.91                                    | 0.42                       | 1.98 | 0.81    | 0.74                                                                        | 0.651/0.501             | 0.578/0.500                       | 0.98                                      |
| Anxiety                       | 1.21                                    | 0.80                       | 1.83 | 0.36    | 0.46                                                                        | 0.651/0.517             | 0.584/0.516                       | 0.40                                      |
| EHRA score                    | 1.09                                    | 0.77                       | 1.54 | 0.64    | 0.60                                                                        | 0.652/0.529             | 0.583/0.514                       | 0.69                                      |

Odds ratios are provided for EHRA score category 3/4 versus 1/2. P-values across all 4 categories are from logistic regression analyses and **additionally from 10-fold cross validation** implemented in SAS proc logistic. All models are adjusted for age, sex, country, body mass index, systolic blood pressure, hypertension, diabetes mellitus, smoking, heart failure, history of myocardial infarction. AUCs (area under the curve) are for the whole model/ partial EHRA component **and measured for resubstitution and 10-fold cross validation.**

**Supplementary Table 7.** Baseline characteristics of individuals excluded due to missing information on any EHRA score

| <b>Variables</b>                                                          | <b>N=216</b> |
|---------------------------------------------------------------------------|--------------|
| Age, years (SD)                                                           | 70.4±11.4    |
| Female gender, N (%)                                                      | 39.8% (86)   |
| Body mass index, kg/m <sup>2</sup> (SD)                                   | 28.8±5.7     |
| Systolic blood pressure, mm Hg (SD)                                       | 129±21       |
| Hypertension, N (%)                                                       | 66.7% (144)  |
| Ever smoking, N (%)                                                       | 45.5% (75)   |
| Alcohol abuse, N (%)                                                      | 3.4% (6)     |
| Diabetes mellitus, N (%)                                                  | 25.0% (54)   |
| Dyslipidaemia, N (%)                                                      | 41.7% (83)   |
| History of myocardial infarction, N (%)                                   | 12.5% (27)   |
| Heart failure, N (%)                                                      | 41.5% (80)   |
| History of ischemic stroke/TIA/other ischemic-thromboembolic event, N (%) | 18.5% (37)   |

Data are presented as mean and standard deviation for continuous variables and number and percentages. Other variables were also partly incomplete in these patients as seen from the numbers.

**Supplementary Table 8.** Spearman correlation coefficients for the EHRA score and its components with PACT- Q items

| <b>EHRA Score</b>                                                                                                                                         | <b>Anxiety</b>     | <b>Chest pain</b>  | <b>Palpitations</b> | <b>Dyspnoea</b>    | <b>Fatigue</b>     | <b>Dizziness</b>   |
|-----------------------------------------------------------------------------------------------------------------------------------------------------------|--------------------|--------------------|---------------------|--------------------|--------------------|--------------------|
| <b>[B1] How difficult is it to take your anticoagulant treatment (e.g., pills or injections, number of pills or injections, frequency of intake ...)?</b> |                    |                    |                     |                    |                    |                    |
| 0.10546<br><0.0001                                                                                                                                        | 0.16633<br><0.0001 | 0.10594<br><0.0001 | 0.17954<br><0.0001  | 0.10539<br><0.0001 | 0.09543<br><0.0001 | 0.09072<br><0.0001 |
| <b>[B2] How bothered are you by taking your anticoagulant treatment?</b>                                                                                  |                    |                    |                     |                    |                    |                    |
| 0.12898<br><0.0001                                                                                                                                        | 0.19448<br><0.0001 | 0.12898<br><0.0001 | 0.20222<br><0.0001  | 0.10518<br><0.0001 | 0.11116<br><0.0001 | 0.07323<br><0.0001 |
| <b>[B3] Some anticoagulant treatments may need dose adjustments; how difficult is this for you?</b>                                                       |                    |                    |                     |                    |                    |                    |
| 0.12773<br><0.0001                                                                                                                                        | 0.19594<br><0.0001 | 0.12075<br><0.0001 | 0.19115<br><0.0001  | 0.10951<br><0.0001 | 0.12683<br><0.0001 | 0.09478<br><0.0001 |
| <b>[B4] Certain medications cannot be taken at all while you are on anticoagulant treatments; how difficult is this for you?</b>                          |                    |                    |                     |                    |                    |                    |
| 0.12383<br><0.0001                                                                                                                                        | 0.20048<br><0.0001 | 0.10256<br><0.0001 | 0.20647<br><0.0001  | 0.11369<br><0.0001 | 0.12825<br><0.0001 | 0.09460<br><0.0001 |
| <b>[B5] It is recommended that certain foods be avoided while taking an anticoagulant treatment; how difficult is this for you?</b>                       |                    |                    |                     |                    |                    |                    |
| 0.07683<br><0.0001                                                                                                                                        | 0.18530<br><0.0001 | 0.11705<br><0.0001 | 0.18827<br><0.0001  | 0.07738<br><0.0001 | 0.10838<br><0.0001 | 0.09460<br><0.0001 |
| <b>[B6] How difficult is it for you to take your anticoagulant treatment when you are away from home?</b>                                                 |                    |                    |                     |                    |                    |                    |
| 0.10162<br><0.0001                                                                                                                                        | 0.16068<br><0.0001 | 0.12057<br><0.0001 | 0.10201<br><0.0001  | 0.09191<br><0.0001 | 0.10385<br><0.0001 | 0.06483<br><0.0001 |
| <b>[B7] How difficult is it for you to plan your time around your anticoagulant treatment (e.g., appointments with nurses, doctors or labs...)?</b>       |                    |                    |                     |                    |                    |                    |
| 0.14566<br><0.0001                                                                                                                                        | 0.17336<br><0.0001 | 0.14388<br><0.0001 | 0.21822<br><0.0001  | 0.12125<br><0.0001 | 0.13797<br><0.0001 | 0.06483<br><0.0001 |

**Supplementary Table 8.** Spearman correlation coefficients for the EHRA score and its components with PACT- Q items (continued)

| <b>EHRA Score</b>                                                                                                                                                              | <b>Anxiety</b>      | <b>Chest pain</b>   | <b>Palpitations</b> | <b>Dyspnoea</b>     | <b>Fatigue</b>      | <b>Dizziness</b>    |
|--------------------------------------------------------------------------------------------------------------------------------------------------------------------------------|---------------------|---------------------|---------------------|---------------------|---------------------|---------------------|
| <b>[B8] How bothered are you by the medical follow-up required with your anticoagulant treatment?</b>                                                                          |                     |                     |                     |                     |                     |                     |
| 0.08453<br><0.0001                                                                                                                                                             | 0.18823<br><0.0001  | 0.11752<br><0.0001  | 0.20081<br><0.0001  | 0.05842<br><0.0001  | 0.09220<br><0.0001  | 0.08461<br><0.0001  |
| <b>[B9] How difficult is it for you to take your anticoagulant treatment as directed on a regular basis?</b>                                                                   |                     |                     |                     |                     |                     |                     |
| 0.12537<br><0.0001                                                                                                                                                             | 0.16171<br><0.0001  | 0.11651<br><0.0001  | 0.21103<br><0.0001  | 0.09063<br><0.0001  | 0.10710<br><0.0001  | 0.08525<br><0.0001  |
| <b>[B10] Do you feel more dependent on others (e.g., partner, family, nurse) because of your anticoagulant treatment?</b>                                                      |                     |                     |                     |                     |                     |                     |
| 0.17240<br><0.0001                                                                                                                                                             | 0.18311<br><0.0001  | 0.12693<br><0.0001  | 0.16914<br><0.0001  | 0.17195<br><0.0001  | 0.16955<br><0.0001  | 0.08525<br><0.0001  |
| <b>[B11] How worried are you about having to interrupt or stop your anticoagulant treatment?</b>                                                                               |                     |                     |                     |                     |                     |                     |
| 0.13061<br><0.0001                                                                                                                                                             | 0.20338<br><0.0001  | 0.12549<br><0.0001  | 0.15611<br><0.0001  | 0.17195<br><0.0001  | 0.11834<br><0.0001  | 0.08525<br><0.0001  |
| <b>[C1] Because of potential side effects (e.g., minor bruises, bleeding...), do you limit your usual activities (i.e., work, leisure, social, or physical activities...)?</b> |                     |                     |                     |                     |                     |                     |
| 0.15334<br><0.0001                                                                                                                                                             | 0.18924<br><0.0001  | 0.14262<br><0.0001  | 0.18691<br><0.0001  | 0.15104<br><0.0001  | 0.15889<br><0.0001  | 0.14754<br><0.0001  |
| <b>[D1] How reassured do you feel by your anticoagulant treatment?</b>                                                                                                         |                     |                     |                     |                     |                     |                     |
| -0.07108<br><0.0001                                                                                                                                                            | -0.10681<br><0.0001 | -0.10686<br><0.0001 | -0.10521<br><0.0001 | -0.7081<br><0.0001  | -0.08733<br><0.0001 | -0.07081<br><0.0001 |
| <b>[D2] Do you feel that your anticoagulant treatment has decreased your symptoms (e.g., leg pain or swelling, palpitations, shortness of breath, or chest pain...)?</b>       |                     |                     |                     |                     |                     |                     |
| -0.05842<br><0.0001                                                                                                                                                            | -0.06600<br><0.0001 | 0.00986<br>0.5077   | -0.05842<br><0.0001 | -0.02086<br><0.0001 | -0.06279<br><0.0001 | 0.04011<br><0.0001  |

**Supplementary Table 8.** Spearman correlation coefficients for the EHRA score and its components with PACT- Q items (continued)

| <b>EHRA Score</b>                                                                                                                                                            | <b>Anxiety</b>      | <b>Chest pain</b>   | <b>Palpitations</b> | <b>Dyspnoea</b>     | <b>Fatigue</b>      | <b>Dizziness</b>    |
|------------------------------------------------------------------------------------------------------------------------------------------------------------------------------|---------------------|---------------------|---------------------|---------------------|---------------------|---------------------|
| <b>[D3] How did your experience with side effects such as minor bruises or bleeding (e.g., while shaving, cooking, after small cuts) compare to what you expected?</b>       |                     |                     |                     |                     |                     |                     |
| -0.13079<br><0.0001                                                                                                                                                          | -0.13910<br><0.0001 | -0.09285<br><0.0001 | -0.12041<br><0.0001 | 0.11865<br><0.0001  | -0.12903<br><0.0001 | -0.07451<br><0.0001 |
| <b>[D4] Regarding the follow-up of your disease and anticoagulant treatment, how satisfied are you with your level of independence?</b>                                      |                     |                     |                     |                     |                     |                     |
| -0.15334<br><0.0001                                                                                                                                                          | -0.15450<br><0.0001 | -0.13176<br><0.0001 | -0.14687<br><0.0001 | -0.12468<br><0.0001 | -0.13208<br><0.0001 | -0.08783<br><0.0001 |
| <b>[D5] How satisfied are you with the methods (e.g., appointments with nurses, doctors, labs) used to ensure the follow-up of your disease and anticoagulant treatment?</b> |                     |                     |                     |                     |                     |                     |
| -0.08021<br><0.0001                                                                                                                                                          | -0.11282<br><0.0001 | -0.12734<br><0.0001 | -0.14360<br><0.0001 | -0.07482<br><0.0001 | -0.07624<br><0.0001 | -0.07045<br><0.0001 |
| <b>[D6] How satisfied are you with the form of your anticoagulant treatment (oral pill / injection)?</b>                                                                     |                     |                     |                     |                     |                     |                     |
| -0.11068<br><0.0001                                                                                                                                                          | -0.14048<br><0.0001 | -0.14555<br><0.0001 | -0.14001<br><0.0001 | -0.09524<br><0.0001 | -0.10708<br><0.0001 | -0.06141<br><0.0001 |
| <b>[D7] Overall, how satisfied are you with your anticoagulant treatment?</b>                                                                                                |                     |                     |                     |                     |                     |                     |
| -0.11068<br><0.0001                                                                                                                                                          | -0.15982<br><0.0001 | -0.12879<br><0.0001 | -0.15225<br><0.0001 | -0.11041<br><0.0001 | -0.11477<br><0.0001 | -0.05738<br>0.0001  |

Spearman's  $r_s$  is provided in the upper, the corresponding P-value in the lower row.

**Supplementary Table 9.** Unadjusted logistic regression analyses for EHRA score (Categories 3/4 versus 1/2) and EHRA symptom dimensions separately in relation to interventions to restore sinus rhythm at one year

| Variable                                   | Odds ratio<br>EHRA 3/4<br>versus 1/2 | 95%<br>Confidence interval |      | P Value | P Value<br>unadjusted logistic<br>regression across<br>all 4 categories |
|--------------------------------------------|--------------------------------------|----------------------------|------|---------|-------------------------------------------------------------------------|
| <b>Cardioversion, N=701</b>                |                                      |                            |      |         |                                                                         |
| Palpitations                               | 1.75                                 | 1.46                       | 2.10 | <0.0001 | <0.0001                                                                 |
| Fatigue                                    | 1.19                                 | 1.01                       | 1.40 | 0.04    | 0.02                                                                    |
| Dizziness                                  | 1.17                                 | 0.92                       | 1.47 | 0.20    | 0.08                                                                    |
| Dyspnea                                    | 1.07                                 | 0.90                       | 1.27 | 0.45    | 0.74                                                                    |
| Chest pain                                 | 1.45                                 | 1.06                       | 1.98 | 0.02    | 0.13                                                                    |
| Anxiety                                    | 0.91                                 | 0.74                       | 1.12 | 0.36    | 0.24                                                                    |
| EHRA score                                 | 1.32                                 | 1.12                       | 1.55 | 0.0008  | 0.009                                                                   |
| <b>Catheter-based ablation, N=226</b>      |                                      |                            |      |         |                                                                         |
| Palpitations                               | 2.76                                 | 2.09                       | 3.65 | <0.0001 | <0.0001                                                                 |
| Fatigue                                    | 1.47                                 | 1.12                       | 1.92 | 0.005   | 0.04                                                                    |
| Dizziness                                  | 1.08                                 | 0.72                       | 1.61 | 0.73    | 0.68                                                                    |
| Dyspnea                                    | 0.90                                 | 0.67                       | 1.21 | 0.48    | 0.41                                                                    |
| Chest pain                                 | 1.42                                 | 0.84                       | 2.40 | 0.19    | 0.57                                                                    |
| Anxiety                                    | 1.30                                 | 0.94                       | 1.80 | 0.11    | 0.46                                                                    |
| EHRA score                                 | 1.76                                 | 1.33                       | 2.34 | <0.0001 | 0.0003                                                                  |
| <b>Sinus rhythm at one year, N=2022</b>    |                                      |                            |      |         |                                                                         |
| Palpitations                               | 1.91                                 | 1.67                       | 2.18 | <0.0001 | <0.0001                                                                 |
| Fatigue                                    | 0.84                                 | 0.75                       | 0.94 | 0.003   | 0.002                                                                   |
| Dizziness                                  | 0.75                                 | 0.63                       | 0.90 | 0.002   | 0.002                                                                   |
| Dyspnea                                    | 0.69                                 | 0.61                       | 0.78 | <0.0001 | <0.0001                                                                 |
| Chest pain                                 | 1.22                                 | 0.96                       | 1.55 | 0.11    | 0.06                                                                    |
| Anxiety                                    | 1.17                                 | 1.02                       | 1.34 | 0.03    | 0.0009                                                                  |
| EHRA score                                 | 0.99                                 | 0.89                       | 1.10 | 0.84    | 0.01                                                                    |
| <b>Adequate heart rate control, N=2734</b> |                                      |                            |      |         |                                                                         |
| Palpitations                               | 0.81                                 | 0.70                       | 0.95 | 0.01    | 0.01                                                                    |
| Fatigue                                    | 0.91                                 | 0.80                       | 1.03 | 0.14    | 0.21                                                                    |
| Dizziness                                  | 0.99                                 | 0.81                       | 1.20 | 0.90    | 0.28                                                                    |
| Dyspnea                                    | 0.93                                 | 0.81                       | 1.06 | 0.28    | 0.70                                                                    |
| Chest pain                                 | 0.81                                 | 0.61                       | 1.07 | 0.14    | 0.25                                                                    |
| Anxiety                                    | 0.97                                 | 0.83                       | 1.14 | 0.72    | 0.10                                                                    |
| EHRA score                                 | 0.85                                 | 0.75                       | 0.96 | 0.008   | 0.02                                                                    |

Odds ratios are provided for EHRA score category 3/4 versus 1/2 in an unadjusted model.

**Supplementary Table 10.** Unadjusted logistic regression analyses for EHRA score (Categories 3/4 versus 1/2) and EHRA symptom dimensions separately in relation to cardiovascular outcomes at one year

| Variable                                                | Odds ratio<br>EHRA 3/4<br>versus 1/2 | 95%<br>Confidence interval |      | P Value | P Value<br>unadjusted logistic<br>regression across<br>all 4 categories |
|---------------------------------------------------------|--------------------------------------|----------------------------|------|---------|-------------------------------------------------------------------------|
| <b>Stroke/TIA/arterial thromboembolic events, N=136</b> |                                      |                            |      |         |                                                                         |
| Palpitations                                            | 1.04                                 | 0.67                       | 1.60 | 0.87    | 0.12                                                                    |
| Fatigue                                                 | 1.35                                 | 0.95                       | 1.91 | 0.09    | 0.40                                                                    |
| Dizziness                                               | 1.52                                 | 0.97                       | 2.40 | 0.07    | 0.0002                                                                  |
| Dyspnea                                                 | 1.51                                 | 1.07                       | 2.14 | 0.02    | 0.08                                                                    |
| Chest pain                                              | 2.13                                 | 1.21                       | 3.75 | 0.009   | <0.0001                                                                 |
| Anxiety                                                 | 0.73                                 | 0.45                       | 1.19 | 0.21    | 0.09                                                                    |
| EHRA score                                              | 1.39                                 | 0.98                       | 1.97 | 0.07    | 0.06                                                                    |
| <b>Coronary events, N=140</b>                           |                                      |                            |      |         |                                                                         |
| Palpitations                                            | 0.81                                 | 0.51                       | 1.29 | 0.38    | 0.52                                                                    |
| Fatigue                                                 | 1.33                                 | 0.94                       | 1.87 | 0.11    | 0.32                                                                    |
| Dizziness                                               | 1.24                                 | 0.77                       | 2.00 | 0.38    | 0.51                                                                    |
| Dyspnea                                                 | 1.68                                 | 1.19                       | 2.36 | 0.0029  | <0.0001                                                                 |
| Chest pain                                              | 3.15                                 | 1.94                       | 5.13 | <0.0001 | <0.0001                                                                 |
| Anxiety                                                 | 1.19                                 | 0.79                       | 1.80 | 0.42    | 0.72                                                                    |
| EHRA score                                              | 1.65                                 | 1.16                       | 2.35 | 0.005   | 0.009                                                                   |
| <b>Heart failure, N=155</b>                             |                                      |                            |      |         |                                                                         |
| Palpitations                                            | 1.11                                 | 0.74                       | 1.66 | 0.61    | 0.68                                                                    |
| Fatigue                                                 | 1.96                                 | 1.42                       | 2.71 | <0.0001 | 0.0002                                                                  |
| Dizziness                                               | 1.53                                 | 0.97                       | 2.41 | 0.07    | 0.08                                                                    |
| Dyspnea                                                 | 2.53                                 | 1.82                       | 3.51 | <0.0001 | <0.0001                                                                 |
| Chest pain                                              | 1.10                                 | 0.51                       | 2.39 | 0.81    | 0.40                                                                    |
| Anxiety                                                 | 1.73                                 | 1.20                       | 2.50 | 0.004   | 0.02                                                                    |
| EHRA score                                              | 1.72                                 | 1.24                       | 2.39 | 0.001   | 0.001                                                                   |
| <b>Major bleeding, N=168</b>                            |                                      |                            |      |         |                                                                         |
| Palpitations                                            | 0.80                                 | 0.52                       | 1.22 | 0.30    | 0.63                                                                    |
| Fatigue                                                 | 1.42                                 | 1.04                       | 1.95 | 0.03    | 0.05                                                                    |
| Dizziness                                               | 1.18                                 | 0.75                       | 1.85 | 0.47    | 0.73                                                                    |
| Dyspnea                                                 | 1.20                                 | 0.87                       | 1.66 | 0.26    | 0.09                                                                    |
| Chest pain                                              | 1.03                                 | 0.52                       | 2.03 | 0.94    | 0.67                                                                    |
| Anxiety                                                 | 1.24                                 | 0.85                       | 1.81 | 0.26    | 0.33                                                                    |
| EHRA score                                              | 1.26                                 | 0.92                       | 1.72 | 0.15    | 0.11                                                                    |

Odds ratios are provided for EHRA score category 3/4 versus 1/2 in an unadjusted model. Coronary events comprised acute coronary syndrome and coronary revascularization. The model for incident heart failure does not include adjustment for heart failure.



**Supplementary Table 11.** Multivariable-adjusted logistic regression analyses for EHRA score (category 2 versus 1) and EHRA symptom dimensions separately in relation to cardiovascular outcomes at one year

| Variable                                                       | Odds ratio<br>EHRA 2<br>versus 1 | 95%<br>Confidence interval |      | P Value | P Value<br>adjusted logistic<br>regression across<br>all 4 categories |
|----------------------------------------------------------------|----------------------------------|----------------------------|------|---------|-----------------------------------------------------------------------|
| <b><i>Stroke/TIA/arterial thromboembolic events, N=136</i></b> |                                  |                            |      |         |                                                                       |
| Palpitations                                                   | 1.41                             | 0.93                       | 2.12 | 0.11    | 0.29                                                                  |
| Fatigue                                                        | 0.89                             | 0.55                       | 1.44 | 0.63    | 0.92                                                                  |
| Dizziness                                                      | 1.77                             | 1.19                       | 2.62 | 0.005   | 0.002                                                                 |
| Dyspnea                                                        | 0.85                             | 0.53                       | 1.37 | 0.51    | 0.59                                                                  |
| Chest pain                                                     | 1.94                             | 1.32                       | 2.84 | 0.0008  | 0.002                                                                 |
| Anxiety                                                        | 1.29                             | 0.88                       | 1.91 | 0.20    | 0.08                                                                  |
| EHRA score                                                     | 0.43                             | 0.23                       | 0.81 | 0.009   | 0.05                                                                  |
| <b><i>Coronary events, N=140</i></b>                           |                                  |                            |      |         |                                                                       |
| Palpitations                                                   | 1.43                             | 0.96                       | 2.14 | 0.08    | 0.21                                                                  |
| Fatigue                                                        | 0.81                             | 0.51                       | 1.30 | 0.38    | 0.73                                                                  |
| Dizziness                                                      | 1.22                             | 0.82                       | 1.80 | 0.32    | 0.72                                                                  |
| Dyspnea                                                        | 1.10                             | 0.68                       | 1.78 | 0.69    | 0.02                                                                  |
| Chest pain                                                     | 1.51                             | 1.01                       | 2.24 | 0.04    | <0.0001                                                               |
| Anxiety                                                        | 1.14                             | 0.76                       | 1.72 | 0.53    | 0.33                                                                  |
| EHRA score                                                     | 0.84                             | 0.40                       | 1.77 | 0.64    | 0.12                                                                  |
| <b><i>Heart failure, N=155</i></b>                             |                                  |                            |      |         |                                                                       |
| Palpitations                                                   | 1.06                             | 0.72                       | 1.55 | 0.77    | 0.42                                                                  |
| Fatigue                                                        | 0.70                             | 0.45                       | 1.10 | 0.12    | 0.0006                                                                |
| Dizziness                                                      | 1.28                             | 0.88                       | 1.86 | 0.20    | 0.19                                                                  |
| Dyspnea                                                        | 1.26                             | 0.81                       | 1.95 | 0.30    | <0.0001                                                               |
| Chest pain                                                     | 1.10                             | 0.73                       | 1.65 | 0.65    | 0.42                                                                  |
| Anxiety                                                        | 1.02                             | 0.68                       | 1.53 | 0.94    | 0.032                                                                 |
| EHRA score                                                     | 0.54                             | 0.30                       | 0.99 | 0.05    | 0.005                                                                 |
| <b><i>Major bleeding, N=168</i></b>                            |                                  |                            |      |         |                                                                       |
| Palpitations                                                   | 1.04                             | 0.72                       | 1.49 | 0.85    | 0.78                                                                  |
| Fatigue                                                        | 1.42                             | 0.88                       | 2.29 | 0.15    | 0.28                                                                  |
| Dizziness                                                      | 1.13                             | 0.78                       | 1.62 | 0.53    | 0.90                                                                  |
| Dyspnea                                                        | 1.10                             | 0.72                       | 1.68 | 0.66    | 0.61                                                                  |
| Chest pain                                                     | 1.14                             | 0.78                       | 1.66 | 0.50    | 0.74                                                                  |
| Anxiety                                                        | 1.08                             | 0.74                       | 1.59 | 0.69    | 0.46                                                                  |
| EHRA score                                                     | 1.49                             | 0.70                       | 3.18 | 0.30    | 0.60                                                                  |

Odds ratios are provided for EHRA score category 2 versus 1 in a multivariable-adjusted model. Covariates are age, sex, country, body mass index, systolic blood pressure, hypertension, diabetes mellitus, smoking, heart failure, history of myocardial infarction. Coronary events comprised acute coronary syndrome and coronary revascularization. The model for incident heart failure does not include adjustment for heart failure.

**Supplementary Table 12.** Multivariable-adjusted logistic regression analyses for EHRA score (category 3 versus 1) and EHRA symptom dimensions separately in relation to cardiovascular outcomes at one year

| Variable                                                | Odds ratio<br>EHRA 3<br>versus 1 | 95%<br>Confidence interval |      | P Value | P Value<br>adjusted logistic<br>regression across<br>all 4 categories |
|---------------------------------------------------------|----------------------------------|----------------------------|------|---------|-----------------------------------------------------------------------|
| <b>Stroke/TIA/arterial thromboembolic events, N=136</b> |                                  |                            |      |         |                                                                       |
| Palpitations                                            | 1.29                             | 0.73                       | 2.29 | 0.38    | 0.29                                                                  |
| Fatigue                                                 | 1.01                             | 0.60                       | 1.69 | 0.97    | 0.92                                                                  |
| Dizziness                                               | 1.28                             | 0.68                       | 2.41 | 0.45    | 0.002                                                                 |
| Dyspnea                                                 | 1.06                             | 0.64                       | 1.77 | 0.81    | 0.59                                                                  |
| Chest pain                                              | 2.37                             | 1.24                       | 4.55 | 0.01    | 0.002                                                                 |
| Anxiety                                                 | 0.61                             | 0.32                       | 1.17 | 0.14    | 0.08                                                                  |
| EHRA score                                              | 0.58                             | 0.31                       | 1.07 | 0.08    | 0.05                                                                  |
| <b>Coronary events, N=140</b>                           |                                  |                            |      |         |                                                                       |
| Palpitations                                            | 1.02                             | 0.54                       | 1.93 | 0.95    | 0.21                                                                  |
| Fatigue                                                 | 0.91                             | 0.55                       | 1.51 | 0.71    | 0.73                                                                  |
| Dizziness                                               | 1.30                             | 0.73                       | 2.32 | 0.37    | 0.72                                                                  |
| Dyspnea                                                 | 1.01                             | 0.57                       | 1.78 | 0.97    | 0.02                                                                  |
| Chest pain                                              | 1.93                             | 0.96                       | 3.88 | 0.06    | <0.0001                                                               |
| Anxiety                                                 | 1.35                             | 0.78                       | 2.34 | 0.28    | 0.33                                                                  |
| EHRA score                                              | 1.10                             | 0.52                       | 2.32 | 0.80    | 0.12                                                                  |
| <b>Heart failure, N=155</b>                             |                                  |                            |      |         |                                                                       |
| Palpitations                                            | 0.95                             | 0.53                       | 1.71 | 0.88    | 0.42                                                                  |
| Fatigue                                                 | 1.29                             | 0.81                       | 2.06 | 0.28    | 0.0006                                                                |
| Dizziness                                               | 1.52                             | 0.85                       | 2.72 | 0.15    | 0.19                                                                  |
| Dyspnea                                                 | 2.69                             | 1.70                       | 4.26 | <0.0001 | <0.0001                                                               |
| Chest pain                                              | 0.92                             | 0.33                       | 2.55 | 0.87    | 0.42                                                                  |
| Anxiety                                                 | 1.54                             | 0.94                       | 2.52 | 0.09    | 0.03                                                                  |
| EHRA score                                              | 0.92                             | 0.51                       | 1.65 | 0.77    | 0.005                                                                 |
| <b>Major bleeding, N=168</b>                            |                                  |                            |      |         |                                                                       |
| Palpitations                                            | 0.78                             | 0.43                       | 1.41 | 0.41    | 0.78                                                                  |
| Fatigue                                                 | 1.54                             | 0.92                       | 2.57 | 0.10    | 0.28                                                                  |
| Dizziness                                               | 1.11                             | 0.64                       | 1.95 | 0.71    | 0.90                                                                  |
| Dyspnea                                                 | 0.85                             | 0.50                       | 1.43 | 0.53    | 0.61                                                                  |
| Chest pain                                              | 0.80                             | 0.32                       | 2.00 | 0.63    | 0.74                                                                  |
| Anxiety                                                 | 1.43                             | 0.88                       | 2.3  | 0.15    | 0.46                                                                  |
| EHRA score                                              | 1.40                             | 0.65                       | 3.01 | 0.39    | 0.60                                                                  |

Odds ratios are provided for EHRA score category 3 versus 1 in a multivariable-adjusted model. Covariates are age, sex, country, body mass index, systolic blood pressure, hypertension, diabetes mellitus, smoking, heart failure, history of myocardial infarction. Coronary events comprised acute coronary syndrome and coronary revascularization. The model for incident heart failure does not include adjustment for heart failure.

**Supplementary Table 13.** Multivariable-adjusted logistic regression analyses for EHRA score (category 4 versus 1) and EHRA symptom dimensions separately in relation to cardiovascular outcomes at one year

| Variable                                                | Odds ratio<br>EHRA 4 versus<br>1 | 95%<br>Confidence interval |       | P Value | P Value<br>adjusted logistic<br>regression across<br>all 4 categories |
|---------------------------------------------------------|----------------------------------|----------------------------|-------|---------|-----------------------------------------------------------------------|
| <b>Stroke/TIA/arterial thromboembolic events, N=136</b> |                                  |                            |       |         |                                                                       |
| Palpitations                                            | 0.77                             | 0.29                       | 2.01  | 0.59    | 0.29                                                                  |
| Fatigue                                                 | 0.89                             | 0.47                       | 1.67  | 0.71    | 0.92                                                                  |
| Dizziness                                               | 3.42                             | 1.62                       | 7.20  | 0.001   | 0.002                                                                 |
| Dyspnoea                                                | 0.73                             | 0.38                       | 1.40  | 0.35    | 0.59                                                                  |
| Chest pain                                              | 1.18                             | 0.16                       | 8.87  | 0.87    | 0.002                                                                 |
| Anxiety                                                 | 0.65                             | 0.25                       | 1.66  | 0.37    | 0.08                                                                  |
| EHRA score                                              | 0.46                             | 0.24                       | 0.89  | 0.02    | 0.05                                                                  |
| <b>Coronary events, N=140</b>                           |                                  |                            |       |         |                                                                       |
| Palpitations                                            | 1.75                             | 0.79                       | 3.86  | 0.17    | 0.21                                                                  |
| Fatigue                                                 | 1.08                             | 0.60                       | 1.94  | 0.80    | 0.73                                                                  |
| Dizziness                                               | 1.12                             | 0.39                       | 3.17  | 0.84    | 0.72                                                                  |
| Dyspnoea                                                | 2.09                             | 1.19                       | 3.66  | 0.01    | 0.02                                                                  |
| Chest pain                                              | 8.46                             | 3.48                       | 20.56 | <0.0001 | <0.0001                                                               |
| Anxiety                                                 | 1.85                             | 0.91                       | 3.75  | 0.09    | 0.33                                                                  |
| EHRA score                                              | 1.50                             | 0.70                       | 3.20  | 0.29    | 0.12                                                                  |
| <b>Heart failure, N=155</b>                             |                                  |                            |       |         |                                                                       |
| Palpitations                                            | 1.71                             | 0.88                       | 3.32  | 0.11    | 0.42                                                                  |
| Fatigue                                                 | 2.10                             | 1.22                       | 3.63  | 0.008   | 0.0006                                                                |
| Dizziness                                               | 1.98                             | 0.88                       | 4.47  | 0.10    | 0.19                                                                  |
| Dyspnoea                                                | 2.50                             | 1.34                       | 4.67  | 0.004   | <0.0001                                                               |
| Chest pain                                              | 2.76                             | 0.81                       | 9.42  | 0.10    | 0.42                                                                  |
| Anxiety                                                 | 2.24                             | 1.21                       | 4.16  | 0.01    | 0.032                                                                 |
| EHRA score                                              | 1.25                             | 0.67                       | 2.32  | 0.49    | 0.005                                                                 |
| <b>Major bleeding, N=168</b>                            |                                  |                            |       |         |                                                                       |
| Palpitations                                            | 1.24                             | 0.58                       | 2.66  | 0.59    | 0.78                                                                  |
| Fatigue                                                 | 1.77                             | 0.98                       | 3.20  | 0.06    | 0.28                                                                  |
| Dizziness                                               | 1.22                             | 0.48                       | 3.10  | 0.67    | 0.90                                                                  |
| Dyspnoea                                                | 1.23                             | 0.70                       | 2.16  | 0.48    | 0.61                                                                  |
| Chest pain                                              | 1.78                             | 0.42                       | 7.56  | 0.44    | 0.74                                                                  |
| Anxiety                                                 | 0.83                             | 0.35                       | 1.95  | 0.66    | 0.46                                                                  |
| EHRA score                                              | 1.74                             | 0.79                       | 3.83  | 0.17    | 0.60                                                                  |

Odds ratios are provided for EHRA score category 4 versus 1 in a multivariable-adjusted model. Covariates are age, sex, country, body mass index, systolic blood pressure, hypertension, diabetes mellitus, smoking, heart failure, history of myocardial infarction. Coronary events comprised acute coronary syndrome and

---

coronary revascularization. The model for incident heart failure does not include adjustment for heart failure.

**Supplementary Table 14.** Unadjusted logistic regression analyses for EHRA score (category 2 versus 1) and EHRA symptom dimensions separately in relation to cardiovascular outcomes at one year

| Variable                                                       | Odds ratio<br>EHRA 2<br>versus 1 | 95%<br>Confidence interval |      | P Value | P Value<br>adjusted logistic<br>regression across<br>all 4 categories |
|----------------------------------------------------------------|----------------------------------|----------------------------|------|---------|-----------------------------------------------------------------------|
| <b><i>Stroke/TIA/arterial thromboembolic events, N=136</i></b> |                                  |                            |      |         |                                                                       |
| Palpitations                                                   | 1.54                             | 1.04                       | 2.29 | 0.03    | 0.12                                                                  |
| Fatigue                                                        | 1.01                             | 0.65                       | 1.59 | 0.96    | 0.40                                                                  |
| Dizziness                                                      | 1.94                             | 1.34                       | 2.82 | 0.0005  | 0.0002                                                                |
| Dyspnoea                                                       | 1.00                             | 0.64                       | 1.54 | 0.99    | 0.08                                                                  |
| Chest pain                                                     | 2.19                             | 1.52                       | 3.16 | <0.0001 | <0.0001                                                               |
| Anxiety                                                        | 1.50                             | 1.04                       | 2.17 | 0.03    | 0.09                                                                  |
| EHRA score                                                     | 0.52                             | 0.28                       | 0.95 | 0.03    | 0.06                                                                  |
| <b><i>Coronary events, N=140</i></b>                           |                                  |                            |      |         |                                                                       |
| Palpitations                                                   | 1.20                             | 0.83                       | 1.73 | 0.35    | 0.52                                                                  |
| Fatigue                                                        | 0.92                             | 0.60                       | 1.43 | 0.72    | 0.32                                                                  |
| Dizziness                                                      | 1.26                             | 0.87                       | 1.82 | 0.22    | 0.51                                                                  |
| Dyspnoea                                                       | 1.32                             | 0.85                       | 2.06 | 0.22    | <0.0001                                                               |
| Chest pain                                                     | 2.03                             | 1.41                       | 2.94 | 0.0002  | <0.0001                                                               |
| Anxiety                                                        | 1.48                             | 0.76                       | 2.91 | 0.73    | 0.72                                                                  |
| EHRA score                                                     | 0.92                             | 0.44                       | 1.92 | 0.83    | 0.009                                                                 |
| <b><i>Heart failure, N=155</i></b>                             |                                  |                            |      |         |                                                                       |
| Palpitations                                                   | 0.98                             | 0.69                       | 1.41 | 0.92    | 0.68                                                                  |
| Fatigue                                                        | 0.78                             | 0.51                       | 1.19 | 0.25    | 0.0002                                                                |
| Dizziness                                                      | 1.30                             | 0.91                       | 1.86 | 0.15    | 0.08                                                                  |
| Dyspnoea                                                       | 1.37                             | 0.90                       | 2.07 | 0.14    | <0.0001                                                               |
| Chest pain                                                     | 1.13                             | 0.77                       | 1.66 | 0.54    | 0.40                                                                  |
| Anxiety                                                        | 1.05                             | 0.72                       | 1.55 | 0.79    | 0.02                                                                  |
| EHRA score                                                     | 0.57                             | 0.32                       | 1.01 | 0.05    | 0.001                                                                 |
| <b><i>Major bleeding, N=168</i></b>                            |                                  |                            |      |         |                                                                       |
| Palpitations                                                   | 0.92                             | 0.66                       | 1.29 | 0.64    | 0.63                                                                  |
| Fatigue                                                        | 1.44                             | 0.94                       | 2.22 | 0.10    | 0.05                                                                  |
| Dizziness                                                      | 1.14                             | 0.81                       | 1.60 | 0.45    | 0.73                                                                  |
| Dyspnoea                                                       | 1.23                             | 0.84                       | 1.81 | 0.28    | 0.09                                                                  |
| Chest pain                                                     | 1.22                             | 0.86                       | 1.73 | 0.26    | 0.67                                                                  |
| Anxiety                                                        | 1.12                             | 0.79                       | 1.60 | 0.51    | 0.33                                                                  |
| EHRA score                                                     | 1.62                             | 0.77                       | 3.40 | 0.21    | 0.11                                                                  |

Odds ratios are provided for EHRA score category 2 versus 1 in an unadjusted model. Coronary events comprised acute coronary syndrome and coronary revascularization. The model for incident heart failure does not include adjustment for heart failure.

**Supplementary Table 15.** Unadjusted logistic regression analyses for EHRA score (category 3 versus 1) and EHRA symptom dimensions separately in relation to cardiovascular outcomes at one year

| Variable                                                               | Odds ratio<br>EHRA 3<br>versus 1 | 95%<br>Confidence interval |      | P Value | P Value<br>adjusted logistic<br>regression across<br>all 4 categories |
|------------------------------------------------------------------------|----------------------------------|----------------------------|------|---------|-----------------------------------------------------------------------|
| <b><i>Stroke/TIA/arterial<br/>Thromboembolic events,<br/>N=136</i></b> |                                  |                            |      |         |                                                                       |
| Palpitations                                                           | 1.51                             | 0.89                       | 2.58 | 0.13    | 0.12                                                                  |
| Fatigue                                                                | 1.39                             | 0.86                       | 2.23 | 0.18    | 0.40                                                                  |
| Dizziness                                                              | 1.59                             | 0.88                       | 2.88 | 0.13    | 0.0002                                                                |
| Dyspnoea                                                               | 1.67                             | 1.06                       | 2.62 | 0.0258  | 0.08                                                                  |
| Chest pain                                                             | 3.08                             | 1.68                       | 5.64 | 0.0003  | <0.0001                                                               |
| Anxiety                                                                | 0.84                             | 0.46                       | 1.53 | 0.56    | 0.09                                                                  |
| EHRA score                                                             | 0.88                             | 0.49                       | 1.57 | 0.65    | 0.06                                                                  |
| <b><i>Coronary events,<br/>N=140</i></b>                               |                                  |                            |      |         |                                                                       |
| Palpitations                                                           | 0.80                             | 0.44                       | 1.45 | 0.46    | 0.52                                                                  |
| Fatigue                                                                | 1.16                             | 0.73                       | 1.87 | 0.53    | 0.32                                                                  |
| Dizziness                                                              | 1.40                             | 0.81                       | 2.43 | 0.23    | 0.51                                                                  |
| Dyspnoea                                                               | 1.28                             | 0.76                       | 2.16 | 0.35    | <0.0001                                                               |
| Chest pain                                                             | 3.04                             | 1.66                       | 5.56 | 0.0003  | <0.0001                                                               |
| Anxiety                                                                | 1.12                             | 0.67                       | 1.87 | 0.68    | 0.72                                                                  |
| EHRA score                                                             | 1.31                             | 0.64                       | 2.68 | 0.47    | 0.009                                                                 |
| <b><i>Heart failure, N=155</i></b>                                     |                                  |                            |      |         |                                                                       |
| Palpitations                                                           | 0.96                             | 0.57                       | 1.62 | 0.87    | 0.68                                                                  |
| Fatigue                                                                | 1.52                             | 0.99                       | 2.35 | 0.06    | 0.0002                                                                |
| Dizziness                                                              | 1.46                             | 0.83                       | 2.56 | 0.19    | 0.08                                                                  |
| Dyspnoea                                                               | 2.97                             | 1.93                       | 4.57 | <0.0001 | <0.0001                                                               |
| Chest pain                                                             | 0.80                             | 0.29                       | 2.19 | 0.66    | 0.40                                                                  |
| Anxiety                                                                | 1.60                             | 1.01                       | 2.53 | 0.05    | 0.02                                                                  |
| EHRA score                                                             | 0.96                             | 0.55                       | 1.69 | 0.90    | 0.001                                                                 |
| <b><i>Major bleeding, N=168</i></b>                                    |                                  |                            |      |         |                                                                       |
| Palpitations                                                           | 0.70                             | 0.41                       | 1.19 | 0.19    | 0.63                                                                  |
| Fatigue                                                                | 1.71                             | 1.07                       | 2.71 | 0.02    | 0.05                                                                  |
| Dizziness                                                              | 1.18                             | 0.70                       | 2.00 | 0.54    | 0.73                                                                  |
| Dyspnoea                                                               | 1.09                             | 0.68                       | 1.72 | 0.73    | 0.09                                                                  |
| Chest pain                                                             | 1.00                             | 0.46                       | 2.17 | 0.99    | 0.67                                                                  |
| Anxiety                                                                | 1.47                             | 0.95                       | 2.28 | 0.08    | 0.33                                                                  |
| EHRA score                                                             | 1.66                             | 0.79                       | 3.52 | 0.18    | 0.11                                                                  |

Odds ratios are provided for EHRA score category 3 versus 1 in an unadjusted model. Coronary events comprised acute coronary syndrome and coronary revascularization. The model for incident heart failure does not include adjustment for heart failure.

**Supplementary Table 16.** Unadjusted logistic regression analyses for EHRA score (category 4 versus 1) and EHRA symptom dimensions separately in relation to cardiovascular outcomes at one year

| Variable                                                | Odds ratio<br>EHRA 4<br>versus 1 | 95%<br>Confidence interval |       | P Value | P Value<br>adjusted logistic<br>regression across<br>all 4 categories |
|---------------------------------------------------------|----------------------------------|----------------------------|-------|---------|-----------------------------------------------------------------------|
| <b>Stroke/TIA/arterial thromboembolic events, N=136</b> |                                  |                            |       |         |                                                                       |
| Palpitations                                            | 0.90                             | 0.35                       | 2.29  | 0.82    | 0.12                                                                  |
| Fatigue                                                 | 1.30                             | 0.72                       | 2.36  | 0.39    | 0.40                                                                  |
| Dizziness                                               | 3.65                             | 1.77                       | 7.54  | 0.0004  | 0.0002                                                                |
| Dyspnoea                                                | 1.23                             | 0.68                       | 2.21  | 0.49    | 0.08                                                                  |
| Chest pain                                              | 1.20                             | 0.16                       | 8.83  | 0.86    | <0.0001                                                               |
| Anxiety                                                 | 0.97                             | 0.42                       | 2.26  | 0.94    | 0.09                                                                  |
| EHRA score                                              | 0.77                             | 0.41                       | 1.45  | 0.42    | 0.06                                                                  |
| <b>Coronary events, N=140</b>                           |                                  |                            |       |         |                                                                       |
| Palpitations                                            | 1.16                             | 0.54                       | 2.46  | 0.71    | 0.52                                                                  |
| Fatigue                                                 | 1.48                             | 0.85                       | 2.56  | 0.16    | 0.32                                                                  |
| Dizziness                                               | 1.21                             | 0.44                       | 3.35  | 0.72    | 0.51                                                                  |
| Dyspnoea                                                | 3.17                             | 1.96                       | 5.15  | <0.0001 | <0.0001                                                               |
| Chest pain                                              | 9.42                             | 4.11                       | 21.59 | <0.0001 | <0.0001                                                               |
| Anxiety                                                 | 1.48                             | 0.76                       | 2.91  | 0.25    | 0.72                                                                  |
| EHRA score                                              | 1.92                             | 0.93                       | 3.95  | 0.08    | 0.009                                                                 |
| <b>Heart failure, N=155</b>                             |                                  |                            |       |         |                                                                       |
| Palpitations                                            | 1.44                             | 0.76                       | 2.72  | 0.26    | 0.68                                                                  |
| Fatigue                                                 | 2.17                             | 1.31                       | 3.61  | 0.003   | 0.0002                                                                |
| Dizziness                                               | 2.36                             | 1.11                       | 5.01  | 0.03    | 0.08                                                                  |
| Dyspnoea                                                | 2.89                             | 1.66                       | 5.04  | 0.0002  | <0.0001                                                               |
| Chest pain                                              | 2.59                             | 0.78                       | 8.59  | 0.12    | 0.40                                                                  |
| Anxiety                                                 | 2.17                             | 1.20                       | 3.91  | 0.01    | 0.03                                                                  |
| EHRA score                                              | 1.36                             | 0.77                       | 2.42  | 0.29    | 0.001                                                                 |
| <b>Major bleeding, N=168</b>                            |                                  |                            |       |         |                                                                       |
| Palpitations                                            | 0.94                             | 0.46                       | 1.90  | 0.86    | 0.63                                                                  |
| Fatigue                                                 | 2.00                             | 1.17                       | 3.42  | 0.01    | 0.05                                                                  |
| Dizziness                                               | 1.45                             | 0.63                       | 3.37  | 0.38    | 0.73                                                                  |
| Dyspnoea                                                | 1.82                             | 1.13                       | 2.93  | 0.01    | 0.09                                                                  |
| Chest pain                                              | 1.52                             | 0.37                       | 6.32  | 0.57    | 0.67                                                                  |
| Anxiety                                                 | 0.88                             | 0.40                       | 1.92  | 0.74    | 0.33                                                                  |
| EHRA score                                              | 2.26                             | 1.06                       | 4.82  | 0.04    | 0.11                                                                  |

Odds ratios are provided for EHRA score category 4 versus 1 in an unadjusted model. Coronary events comprised acute coronary syndrome and coronary revascularization. The model for incident heart failure does not include adjustment for heart failure

## Reference List

1. Wynn GJ, Todd DM, Webber M, Bonnett L, McShane J, Kirchhof P, Gupta D. The European Heart Rhythm Association symptom classification for atrial fibrillation: validation and improvement through a simple modification. *Europace* 2014;16:965-972.
2. Rabin R, de CF. EQ-5D: a measure of health status from the EuroQol Group. *Ann Med* 2001;33:337-343.
3. Boriani G, Laroche C, Diemberger I, Fantecchi E, Popescu MI, Rasmussen LH, Dan GA, Kalarus Z, Tavazzi L, Maggioni AP, Lip GY. 'Real-world' management and outcomes of patients with paroxysmal vs. non-paroxysmal atrial fibrillation in Europe: the EURObservational Research Programme-Atrial Fibrillation (EORP-AF) General Pilot Registry. *Europace* 2016;18:648-657.
4. Vermond RA, Crijns HJ, Tijssen JG, Alings AM, van den Berg MP, Hillege HL, van Veldhuisen DJ, Van Gelder IC, Rienstra M. Symptom severity is associated with cardiovascular outcome in patients with permanent atrial fibrillation in the RACE II study. *Europace* 2014;16:1417-1425.
5. Schnabel RB, Aspelund T, Li G, et al. Validation of an atrial fibrillation risk algorithm in whites and african americans. *Arch Intern Med* 2010;170:1909-1917.
6. Schnabel RB, Rienstra M, Sullivan LM, et al. Risk assessment for incident heart failure in individuals with atrial fibrillation. *Eur J Heart Fail* 2013;15:843-849.
7. Sandhu RK, Ezekowitz J, Andersson U, Alexander JH, Granger CB, Halvorsen S, Hanna M, Hijazi Z, Jansky P, Lopes RD, Wallentin L. The 'obesity paradox' in atrial fibrillation: observations from the ARISTOTLE (Apixaban for Reduction in Stroke and Other Thromboembolic Events in Atrial Fibrillation) trial. *Eur Heart J* 2016;37:2869-2878.
8. Alonso A, Krijthe BP, Aspelund T, et al. Simple Risk Model Predicts Incidence of Atrial Fibrillation in a Racially and Geographically Diverse Population: the CHARGE-AF Consortium. *J Am Heart Assoc* 2013;2:e000102.
9. Freeman JV, Simon DN, Go AS, et al. Association Between Atrial Fibrillation Symptoms, Quality of Life, and Patient Outcomes: Results From the Outcomes Registry for Better Informed Treatment of Atrial Fibrillation (ORBIT-AF). *Circ Cardiovasc Qual Outcomes* 2015;8:393-402.
10. Conen D, Tedrow UB, Cook NR, Moorthy MV, Buring JE, Albert CM. Alcohol consumption and risk of incident atrial fibrillation in women. *JAMA* 2008;300:2489-2496.
11. Larsson SC, Drca N, Wolk A. Alcohol consumption and risk of atrial fibrillation: a prospective study and dose-response meta-analysis. *J Am Coll Cardiol* 2014;64:281-289.



12. Sandhu RK, Hohnloser SH, Pfeffer MA, Yuan F, Hart RG, Yusuf S, Connolly SJ, McAlister FA, Healey JS. Relationship between degree of left ventricular dysfunction, symptom status, and risk of embolic events in patients with atrial fibrillation and heart failure. *Stroke* 2015;46:667-672.
13. Boriani G, Botto GL, Padeletti L, Santini M, Capucci A, Gulizia M, Ricci R, Biffi M, De ST, Corbucci G, Lip GY. Improving Stroke Risk Stratification Using the CHADS2 and CHA2DS2-VASc Risk Scores in Patients With Paroxysmal Atrial Fibrillation by Continuous Arrhythmia Burden Monitoring. *Stroke* 2011;42:1768-1770.
14. Prins MH, Guillemin I, Gilet H, Gabriel S, Essers B, Raskob G, Kahn SR. Scoring and psychometric validation of the Perception of Anticoagulant Treatment Questionnaire (PACT-Q). *Health Qual Life Outcomes* 2009;7:30.
